# Supplementary material for: First Description of Non-Enzymatic Radical-Generating Mechanisms Adopted by Fomitiporia mediterranea: An Unexplored Pathway of the White Rot Agent of the Esca Complex of Diseases
Source: J Fungi (Basel). 2023 Apr 21;9(4):498. doi: 10.3390/jof9040498 (PMC10143301; doi:10.3390/jof9040498)
Supplement: Supplementary file 1 [file jof-09-00498-s001.zip › Table S1_revised.pdf]

**Table S1.** List of *Fomitiporia mediterranea* strains used during the experiments, originating from different mycological collections. A key was attributed to each strain, to facilitate data interpretation.

| Key | Strain code | Isolation locality                | Collection from which the strain was sourced                                                               | Host                                          | Sampling date |
|-----|-------------|-----------------------------------|------------------------------------------------------------------------------------------------------------|-----------------------------------------------|---------------|
| Fm1 | 235.03      | Riotorto (Livorno), It            | Fungal collection PVFi of DAGRI, Section of Plant pathology and entomology (University of Florence, Italy) | <i>Olea europaea</i> L.                       | 2003          |
| Fm2 | LR71        | Vendargues (34), Fr               | Fungal collection of INRAE Montpellier, DAAV team of UMR AGAP (INRAE, Montpellier, France)                 | <i>Vitis vinifera</i><br>cv Alphonse Lavallée | 1996          |
| Fm3 | LR2         | Beauvoisin (30), Fr               | Fungal collection of INRAE Montpellier, DAAV team of UMR AGAP (INRAE, Montpellier, France)                 | <i>Vitis vinifera</i><br>cv Carignan          | 1996          |
| Fm4 | LR124       | Villeneuve les Maguelone (34), Fr | Fungal collection of INRAE Montpellier, DAAV team of UMR AGAP (INRAE, Montpellier, France)                 | <i>Vitis vinifera</i><br>cv Carignan          | 1996          |
| Fm5 | LR85        | Ortoffa (66), Fr                  | Fungal collection of INRAE Montpellier, DAAV team of UMR AGAP (INRAE, Montpellier, France)                 | <i>Vitis vinifera</i><br>cv Grenache          | 1996          |
| Fm6 | PHCO36      | Saint-Preuil (16), Fr             | INRA-UMR 1065 SAVE collection (INRAE, Bordeaux, France)                                                    | <i>Vitis vinifera</i><br>cv Ugni blanc        | 1996          |
