# Supplementary material for: First Description of Non-Enzymatic Radical-Generating Mechanisms Adopted by Fomitiporia mediterranea: An Unexplored Pathway of the White Rot Agent of the Esca Complex of Diseases
Source: J Fungi (Basel). 2023 Apr 21;9(4):498. doi: 10.3390/jof9040498 (PMC10143301; doi:10.3390/jof9040498)
Supplement: Supplementary file 1 [file jof-09-00498-s001.zip › Table S2_revised.pdf]

**Table S2.** Statistical analysis of LMW phenol-derived compounds determined by UHPLC-MS/MS. Results were analyzed by Kruskal-Wallis test (left-hand superscript “a”) or one-way ANOVA (left-hand superscript “b”) according to data distribution and homoscedasticity, followed by multiple comparison tests ( $P < 0.05$ ), accordingly. Different letters indicate significant differences between *Fmed* strains.

| Statistical differences                                           |          |            |            |            |            |            |            |
|-------------------------------------------------------------------|----------|------------|------------|------------|------------|------------|------------|
| Compound name                                                     | P value  | <i>Fm1</i> | <i>Fm2</i> | <i>Fm3</i> | <i>Fm4</i> | <i>Fm5</i> | <i>Fm6</i> |
| <sup>b</sup> 4-Hydroxybenzaldehyde                                | < 0.0001 | <i>C</i>   | <i>B</i>   | <i>C</i>   | <i>A</i>   | <i>C</i>   | <i>ABC</i> |
| <sup>a</sup> Benzoic acid                                         | 0.0005   | <i>ABC</i> | <i>ABC</i> | <i>BC</i>  | <i>A</i>   | <i>C</i>   | <i>AB</i>  |
| <sup>b</sup> 4-Hydroxy-3-methoxybenzoic acid<br>(vanillic acid)   | < 0.0001 | <i>A</i>   | <i>B</i>   | <i>B</i>   | <i>C</i>   | <i>C</i>   | <i>A</i>   |
| <sup>b</sup> 4-Hydroxycinnamic acid<br>( <i>p</i> -coumaric acid) | < 0.0001 | <i>C</i>   | <i>D</i>   | <i>A</i>   | <i>E</i>   | <i>B</i>   | <i>C</i>   |
| <sup>a</sup> 2-Hydroxybenzoic acid<br>(salicylic acid)            | 0.0030   | <i>B</i>   | <i>AB</i>  | <i>B</i>   | <i>A</i>   | <i>AB</i>  | <i>AB</i>  |
| <sup>a</sup> 3-Methoxybenzaldehyde                                | 0.0005   | <i>BC</i>  | <i>ABC</i> | <i>A</i>   | <i>ABC</i> | <i>C</i>   | <i>AB</i>  |
| <sup>b</sup> N-Acetyl-5-aminosalicylic acid                       | <0.0001  | <i>B</i>   | <i>B</i>   | <i>B</i>   | <i>B</i>   | <i>A</i>   | <i>AB</i>  |
| <sup>a</sup> Methyl-4-hydroxybenzoate                             | 0.0010   | <i>A</i>   | <i>AB</i>  | <i>B</i>   | <i>AB</i>  | <i>B</i>   | <i>AB</i>  |
| <sup>a</sup> 4-Hydroxy-3- methoxybenzaldehyde<br>(vanillin)       | 0.0008   | <i>ABC</i> | <i>ABC</i> | <i>BC</i>  | <i>A</i>   | <i>C</i>   | <i>AB</i>  |
| <sup>a</sup> 5-Hydroxyindole-3-acetic acid                        | 0.0006   | <i>A</i>   | <i>AB</i>  | <i>BC</i>  | <i>C</i>   | <i>ABC</i> | <i>ABC</i> |
| <sup>a</sup> Hypholomine B (isomer a)                             | 0.0011   | <i>BC</i>  | <i>ABC</i> | <i>A</i>   | <i>C</i>   | <i>AB</i>  | <i>ABC</i> |
| <sup>a</sup> Hypholomine B (isomer b)                             | 0.0007   | <i>B</i>   | <i>AB</i>  | <i>AB</i>  | <i>B</i>   | <i>A</i>   | <i>AB</i>  |
